# Supplementary material for: Intersigmoid Hernia: A Forgotten Diagnosis—A Systematic Review of the Literature over Anatomical, Diagnostic, Surgical, and Medicolegal Aspects
Source: Hindawi journal article supplement (doi:10.1155/2020/4891796), 2020-06-01
Supplement: f1 [file 4891796.f1.pdf]

## SDC 1: References of included studies

1. Agarwal A, Ray U, Hossain MZ, Mitra N, Das A, Agarwal A, Gupta M. "Congenital intramesosigmoid hernia- a case report of a rare sigmoid mesocolon hernia". *Indian J Surg.* 2011 Dec;73(6):450-2. doi: 10.1007/s12262-011-0275-9. Epub 2011 Apr 16. PubMed PMID: 23204707; PubMed Central PMCID: PMC3236271.
2. Agatsuma Y, Iizuka A, Sato B *et al.* "A Case of Strangulated Ileus Caused by Intramesosigmoid Hernia with Left Paraduodenal Hernia". *Nihon Rinsho Geka Gakkai Zasshi (Journal of Japan Surgical Association)*. 2017 Volume 78 Issue 11 2465-2468 DOI: <https://doi.org/10.3919/jjsa.78.2465>
3. Ahmad N, Faiz N, Kumari R, et al. "Intramesosigmoid hernia presenting as intestinal obstruction". *J. Evolution Med. Dent. Sci.* 2017;6(47):3673-3675, DOI: 10.14260/Jemds/2017/793
4. Akiyama Y, Aoki K, Nakaya T, Fujiwara H *et al.* "Intestinal Obstruction due to an Intramesosigmoid Hernia". *The Japanese Journal of Gastroenterological Surgery*. 2004 Volume 37 Issue 11 1781-1786 DOI: <https://doi.org/10.5833/jjgs.37.1781>
5. Ankit Shukla, Ramesh Bharti, Satish Kumar, Rajesh Chaudhary (September 2015). Dealing with intramesosigmoid hernia: A rare variety of internal hernia. *Archives of clinical and experimental surgery*. DOI: 10.5455/aces20151020060526
6. Bandawar MS, Nayak P, Shaikh IA, Sakthivel MS, Yadav TD. "Strangulated small bowel obstruction secondary to a transmesosigmoid hernia". *Indian J Surg.* 2014 Apr;76(2):148-9. doi: 10.1007/s12262-012-0649-7. Epub 2012 Jul 4. PubMed PMID: 24891782; PubMed Central PMCID: PMC4039682.
7. Bao SQ. "Two cases of mesentery hernia causing strangulation obstruction". *Qiqihaer Yixue Xuebao* 2009; 30: 1951-1952
8. Benson JR, Killen DA. "Internal hernias involving the sigmoid mesocolon". *Ann Surg.* 1964 Mar;159:382-4. PubMed PMID: 14129383; PubMed Central PMCID: PMC1408577.
9. Benyamini P, Lopez S, Cooper M, Mohamad O, Maldini G. "Congenital Mesenteric Defect: An Uncommon Cause of Bowel Obstruction". *Hawaii J Med Public Health.* 2016 Feb;75(2):46-7. PubMed PMID: 26918208; PubMed Central PMCID: PMC4755067.
10. Bircher, Martin Derek, and Anthony Edward Stuart. "Internal herniation involving the sigmoid mesocolon." *Diseases of the Colon & Rectum* 24.5 (1981): 404-406. PubMed PMID: 7261828.
11. Campbell, Aideen, K. Atkin, Gary. (2015). "Laparoscopic Repair of Incarcerated Intersigmoid Hernia". *CRSLS: MIS Case Reports from SLS*. 19. DOI: 10.4293/CRSLS.2013.00214
12. Chou CK. Internal hernia of the small bowel through the sigmoid mesocolon. *Int J Radiol Radiat Ther.* 2017;2(6):142-144. DOI: 10.15406/ijrrt.2017.02.00044

13. Collins D, Kavanagh D, Myers E, Richards S, McDermott E. "Incarcerated transmesosigmoid hernia presenting in a 60-year-old man: a case report". *J Med Case Rep*. 2008 May 17;2:161. doi: 10.1186/1752-1947-2-161. PubMed PMID: 18485232; PubMed Central PMCID: PMC2396178.
14. Endo Y, Yoshida T et al. "A case of transmesosigmoid hernia". *The Japanese Journal of Gastroenterological Surgery*. 2001 Volume 34 Issue 5 510-514 DOI: <https://doi.org/10.5833/jjgs.34.510>
15. Farah RH, Fahmi Y, Khaiz D, Elhattabi K, Bensardi F, Lefriyekh R, Berrada S, Fadil A, Ouariti NZ. "Post-operative transmesosigmoid hernia causing small bowel obstruction: a case report." *Pan Afr Med J*. 2015 Apr 1;20:318. doi: 10.11604/pamj.2015.20.318.5752. eCollection 2015. PubMed PMID: 26175809; PubMed Central PMCID: PMC4491479.
16. Fujioka M, Munezawa T, Hayama T, Watanabe S, Kinoshita I, Ishida K, Satomi A, Takahashi K. "Intersigmoid hernia-report of two cases". *Jpn J Gastroenterol Surg*. 1976. Volume 9 Issue 2 Pages 199-203 DOI <https://doi.org/10.5833/jjgs.9.199>
17. Fukuzawa J, Matsuo R, Nakano Y. "A Case of Intersigmoid Hernia Treated with Laparoscopy". *Nihon Gekakei Rengo Gakkaishi (Journal of Japanese College of Surgeons)* 2014 Volume 39 Issue 2 223-227 DOI: <https://doi.org/10.4030/jjcs.39.223>
18. Furukawa k, Tsutsumi J, Takayama S *et al*. "A Case of Small Bowel Obstruction Due to Intramesosigmoid Hernia". *Nihon Gekakei Rengo Gakkaishi (Journal of Japanese College of Surgeons)*. 2014 Volume 39 Issue 4 787-790 DOI <https://doi.org/10.4030/jjcs.39.787>
19. Ghahremani GG. "Abdominal and pelvic hernias". In: Gore RM, Levine MS, editors. *Textbook of Gastrointestinal Radiology*. Philadelphia, PA: Saunders; 2000. 1993–2009.
20. Guo L. "Diagnosis and treatment of congenital transmesosigmoid hernia". *Yiyao Luntan Zazhi* 2011; 32: 147-148
21. Harrison OJ, Sharma RD, Niayesh MH. "Early intervention in intersigmoid hernia may prevent bowel resection-A case report". *Int J Surg Case Rep*. 2011;2(8):282-4. doi: 10.1016/j.ijscr.2011.08.010. Epub 2011 Sep 14. PubMed PMID: 22096754; PubMed Central PMCID: PMC3215259.
22. Hattori S, Yamazaki S, Yoshida N *et al*. "A Case of Intramesosigmoid Hernia Invaginating into a Mesenteric Defect on the Right Peritoneal Surface of the Sigmoid Mesentery". *Nihon Gekakei Rengo Gakkaishi (Journal of Japanese College of Surgeons)*. 2016 Volume 41 Issue 5 858-863 DOI <https://doi.org/10.4030/jjcs.41.858>
23. Hayama T, Shioya T, Hankyo M, Shimizu T, Shibuya H, Komine O, Watanabe Y, Nanbu K, Yamada T. "A Case of Laparoscopically Repositioned Intersigmoid Hernia in an 80s Man". *Nihon Gekakei Rengo Gakkaishi (Journal of Japanese College of Surgeons)*. 2017 Volume 42 Issue 1 127-133 DOI <https://doi.org/10.4030/jjcs.42.127>
24. He M, Zhong QX, Yang ZX. "Congenital large transmesosigmoid hernia, case report". *Zhengjiang Chuangshang Waike* 1999; 7: 122

25. Hibino S, Sakakibara T, Niwa S, Oshima K, Ito, A, Sakakibara S. "A case of transmesosigmoid hernia". *Nihon Rinsho Geka Gakkai Zasshi (Journal of Japan Surgical Association)*. 2008 Volume 69 Issue 5 1274-1277 DOI: <https://doi.org/10.3919/jjsa.69.1274>
26. Hirashima K, Date K, Fujita K, Koide N, Kamuro A, Kato H, Fujita N. "Strangulation of the small intestine caused by an intra-mesosigmoid hernia: a case report". *Surg Case Rep*. 2017 Dec 21;3(1):129. doi: 10.1186/s40792-017-0406-z.PubMed PMID: 29270809; PubMed Central PMCID: PMC5740056.
27. Hirata S, Yokoyama H, Otsu T *et al*. "A Case Report of Ileus due to Intramesosigmoid Hernia that Developed in the 29th Week of Pregnancy". *Nihon Fukubu Kyukyu Igakkai Zasshi (Journal of Abdominal Emergency Medicine)*. 2015 Volume 35 Issue 6 781-784 DOI: <https://doi.org/10.11231/jaem.35.781>
28. Hori Y, Nakamoto H, Itagaki R *et al*. "A Case of Laparoscope Assisted Repair for an Intramesosigmoid Hernia". *Nihon Fukubu Kyukyu Igakkai Zasshi (Journal of Abdominal Emergency Medicine)*. 2014 Volume 34 Issue 3 765-769 DOI: <https://doi.org/10.11231/jaem.34.765>
29. Horii N, Kamimukai N, Wada T *et al*. "A Case of Sigmoid Mesocolic Hernia". *Nihon Fukubu Kyukyu Igakkai Zasshi (Journal of Abdominal Emergency Medicine)*. 2015 Volume 35 Issue 1 131-134 DOI: <https://doi.org/10.11231/jaem.35.131>
30. Hoshikawa T, Oida Y, Nakamura T, Mukai M, Makuuchi H. "A case of internal hernia of the mesentery of the sigmoid colon". *Nihon Rinsho Geka Gakkai Zasshi (Journal of Japan Surgical Association)*. 2006 Volume 67 Issue 10 2474-2478 DOI: <https://doi.org/10.3919/jjsa.67.2474>
31. Ido M, Kuroda H, Ito A, Kato K, Kato H *et al*. "A case of intermesosigmoid hernia causing wide range of retroperitoneal abscess". *Nihon Rinsho Geka Gakkai Zasshi (Journal of Japan Surgical Association)*. 1998 Volume 59 Issue 12 3189-3193 DOI: <https://doi.org/10.3919/jjsa.59.3189>
32. Igarashi A., Okuda K., Nishiwaki M., Tsujitsuka K., Kiyono, T., Sumiyama M. "A Case of Internal Hernia Involving the Sigmoid Mesocolon Diagnosed Preoperatively". *Jpn J Gastroenterol Surg* 31: 1816-1820, 1998
33. Ishita T, Oishi H, Ishii M *et al*. "A Case of Intersigmoid Hernia during Pregnancy". *Nihon Fukubu Kyukyu Igakkai Zasshi (Journal of Abdominal Emergency Medicine)* 2015 Volume 35 Issue 3 289-292 DOI: <https://doi.org/10.11231/jaem.35.289>
34. Isobe H, Takiguchi M, Hayashi K, Miura T, Inaba Y, watabe S. "A case of intramesosigmoid hernia treated with laparoscopy". *Nihon Rinsho Geka Gakkai Zasshi (Journal of Japan Surgical Association)*. 2007 Volume 68 Issue 2 447-451 DOI: <https://doi.org/10.3919/jjsa.68.44>
35. Iwasaki K, Hujita T, Ohashi M. "A Case of Intramesosigmoid Hernia". *The Kitakanto Medical Journal* 2016 Volume 66 Issue 2 163-166 DOI: <https://doi.org/10.2974/kmj.66.163>
36. Jimmy J, Wani SV, Shetty VV, Patankar RV. "Laparoscopic management of small bowel obstruction caused by a Sigmoid Mesocolic hernia. *J Minim Access Surg*. 2011 Oct;7(4):

- 236-8. doi: 10.4103/0972-9941.85647. PubMed PMID: 22022113; PubMed Central PMCID: PMC3193694.
37. Johnson BL, Lind JF, Ulich PJ. "Transmesosigmoid hernia during pregnancy". *South Med J*. 1992 Jun;85(6):650-2. PubMed PMID: 1604396.
  38. Kan H, Suzuki H, Takasaki H, Sasaki J, Furukawa K, Tajiri T. "A case of an intramesosigmoid hernia". *J Nippon Med Sch*. 2009 Feb;76(1):13-8. PubMed PMID: 19305105.
  39. Kaneko J, Imai N et al. "A Case Report of Transmesosigmoid Hernia". *The Japanese Journal of Gastroenterological Surgery*. 1998 Volume 31 Issue 11 2280-2283 DOI: <https://doi.org/10.5833/jjgs.31.2280>
  40. Katayanagi S, Ohue M, Yamaguchi T, Takahashi K, Mor T. "A Case Report of Intramesosigmoid Hernia". *The Japanese Journal of Gastroenterological Surgery*. 2003 Volume 36 Issue 4 304-308 DOI: <https://doi.org/10.5833/jjgs.36.304>
  41. Kayano H, Nomura E, Kuramoto T, Yatabe K, Yoshii H, Yokoyama D, Machida T, Uda S, Koike T, Izumi H, Hasegawa S, Mukai M, Makuuchi H. "Two Cases of Laparoscopic Diagnosis and Treatment of Intersigmoid Hernia". *Tokai J Exp Clin Med*. 2017 Jul;42(2) 109-114. PMID: 28681372.
  42. Kheok SW, Haja Mohideen SM, Lim JW, Santhosh Raj SR. "Intramesosigmoid hernia complicated by strangulated small-bowel obstruction". *BMJ Case Rep*. 2016 Jul 15;2016. pii: bcr2016216369. doi: 10.1136/bcr-2016-216369. PubMed PMID: 27432828; PubMed Central PMCID: PMC4956957.
  43. Kim, Ji Won, and Dae Hyun Yang. "Transmesosigmoid hernia with small bowel strangulation." *International Journal of Case Reports and Images (IJCRI)* 3.12 (2013): 25-28.
  44. Kishi Y, Yumoto T, Tsukahara K, Nakao A, et al. (2017). "A Rare Presentation of Acute Abdomen due to Intersigmoid Hernia Successfully Treated by Laparoscopic Surgery. *M J Surg* 1(1): 005.
  45. Kobayashi A, Koseki H, Masuko T, Owada Y. "Two Cases of Intestinal Obstruction Due to Internal Hernia". *The Japanese Journal of Gastroenterological Surgery* 2000 Volume 33 Issue 5 634-638 DOI: <https://doi.org/10.5833/jjgs.33.634>
  46. Kohga A, Iwasaki Y, Murata T, Okamoto J, Shimizu S, Takahashi S. "A case of intramesosigmoid hernia". *Nihon Rinsho Geka Gakkai Zasshi (Journal of Japan Surgical Association)* 72(1):172-175 · January 2011 DOI <https://doi.org/10.3919/jjsa.72.172>
  47. Koinuma J, Takeyama S, Sasamura Y, Hara T, Numata A, Nenohi M. A case of intramesosigmoid hernia diagnosed preoperatively and treated with laparoscopy. *J Jpn Surg Assoc* 2004; 65: 722-725.
  48. Kojima S, Sakamoto T, Honda M, Kim DH. "Strangulated transmesosigmoid hernia as a late complication of a fall from a height: A case report. *Int J Surg Case Rep*. 2016;27:137-140. doi: 10.1016/j.ijscr.2016.08.031. Epub 2016 Aug 26. PubMed PMID: 27614337; PubMed Central PMCID: PMC5018078.

49. Koshino K, Kosugi C, Yasuda H, Koda K *et al.* "A Case of Internal Hernia of the Mesentery of the Sigmoid Colon". *Nihon Fukubu Kyukyu Igakkai Zasshi (Journal of Abdominal Emergency Medicine)*. 2012 Volume 32 Issue 4 823-826 DOI: <https://doi.org/10.11231/jaem.32.823>
50. Kumagai K, Yoshioka M, Iida M, Kudoh K, Uchinami H, Watanabe T, Yamamoto Y. "Usefulness of Oblique Multiplanar Images on Multi-Detector Computed Tomography for Diagnosing Intersigmoid Hernia". *Visc Med*. 2016 Dec;32(6):437-440. Doi: 10.1159/000450633. Epub 2016 Nov 22. PubMed PMID: 28229081; PubMed Central PMCID: PMC5290440.
51. Kuroda T, Wakabayashi M *et al.* "A Case of Intramesosigmoid Hernia Treated by Laparoscopic Surgery". *Journal of Nihon University Medical Association*. 2015 Volume 74 Issue 5 263-266 DOI: [https://doi.org/10.4264/numa.74.5\\_263](https://doi.org/10.4264/numa.74.5_263)
52. Li B, Assaf A, Gong YG, Feng LZ, Zheng XY, Wu CN. "Transmesosigmoid hernia: case report and review of literature. *World J Gastroenterol*. 2014 May 21;20(19):5924-9. doi: 10.3748/wjg.v20.i19.5924. Review. PubMed PMID: 24914355; PubMed Central PMCID: PMC4024804.
53. Li HC. Case report of transmesosigmoid hernia. *Yishui Yizhuan Xuebao* 1985; 7: 68
54. Luo ZK. "Misdiagnosed as intestinal necrosis of transmesosigmoid hernia, case report". *Anhui Yike Daxue Xuebao* 1996; 31: 202
55. Mandava, Rupesh, and Rajani Gorantla. "CT diagnosis of sigmoid." *International Medical Journal* 1.9 (2014): 548-550.
56. Martin LC, Merkle EM, Thompson WM. "Review of internal hernias: radiographic and clinical findings". *Am J Roentgenol*. 2006; 186(3):703-17.
57. Maruyama H, Mio D, Takagi T, Kinoshita T, Nakayama H, Sekiya M. "A case of intersigmoid hernia treated with laparoscopic-assisted surgery". *Nihon Rinsho Geka Gakkai Zasshi (Journal of Japan Surgical Association)*. 2005 Volume 66 Issue 8 2033-2037 DOI: <https://doi.org/10.3919/jjsa.66.2033>
58. Maruyama H, Suzuki N, Sasaki M, Sekiya M, Mio H. "Two cases of intersigmoid hernia". *Jpn J Gastroenterol Surg*. 2002; 35: 1721-1725.
59. Matsuda T, Morikawa E, Kubo R *et al.* "A case report of intersigmoid hernia". *The Japanese Journal of Gastroenterological Surgery*
60. Matsui T, Kitagami H, Kondo Y, Nonoyama K, Watanabe K, Fujihata S, Yasuda A, Yamamoto M, Tanaka M. "An Intersigmoid Hernia Treated with Laparoscopic Surgery". *The Japanese Journal of Gastroenterological Surgery*. 2016 Volume 49 Issue 4 360-366 DOI: <https://doi.org/10.5833/jjgs.2014.0271>
61. Michiko Hinata, Mitsunori Saito and Tetsuya Aono. "Two Cases of Intramesosigmoid Hernia". *Nihon Gekakei Rengo Gakkaishi (Journal of Japanese College of Surgeons)*. 2011 Volume 36 Issue 1 Pages 55-60 DOI <https://doi.org/10.4030/jjcs.36.55>

62. Mitsui K, Namiki K, Matsumoto H, Konno F, Takeyama D, Notsuda H. Laparoscopic treatment for intramesosigmoid hernia: report of a case. *J Jpn Surg Assoc* 2005; 66: 3006-3010.
63. Miura E, Sasaki S, Nakayama H, Watanabe T. "Three cases of intersigmoid hernia". *Nihon Rinsho Geka Gakkai Zasshi (Journal of Japan Surgical Association)*. 2013 Volume 74 Issue 3 838-843 DOI: <https://doi.org/10.3919/jjsa.74.838>
64. Mo J. "Case report of transmesosigmoid hernia causing small bowel necrosis". *Guangxi Yixue* 1991; 18: 54
65. Moriyama H, Koyama T, Tanaka J, Terashima T, Kanou S. "A case of transmesosigmoid hernia". *Nihon Rinsho Geka Gakkai Zasshi (Journal of Japan Surgical Association)*. 2010 Volume 71 Issue 1 208-211 DOI: <https://doi.org/10.3919/jjsa.71.208>
66. Motohiro T, Sanada T, Omichi M, Hamada Y. "A Case of Transmesosigmoid Hernia in an Adult". *The Japanese Journal of Gastroenterological Surgery*. 2004 Volume 37 Issue 11 1777-1780 DOI: <https://doi.org/10.5833/jjgs.37.1777>.
67. Murakami S, Okajima K, Isozaki H *et al.* "Intestinal obstruction due to intersigmoid hernia". *The journal of the Japanese Practical Surgeon Society* 1996 Volume 57 Issue 8 1983-1987 DOI <https://doi.org/10.3919/ring1963.57.1983>
68. Murata Y, Miyata K, Yuasa N, Takeuchi E, Miyake H, Kobayashi Y. "A case of an intramesosigmoid hernia". *Nihon Rinsho Geka Gakkai Zasshi (Journal of Japan Surgical Association)*. 2009; Volume 70 Issue 3 886-890 doi: <https://doi.org/10.3919/jjsa.70.886>
69. Nachi S, Hino A, Iwata H, Sekino T. "A case of intramesosigmoid hernia with summary of the Japanese literature". *Nihon Rinsho Geka Gakkai Zasshi (Journal of Japan Surgical Association)*. 2005 volume 66, No. 11 2807-2811 DOI <https://doi.org/10.3919/jjsa.66.2807>
70. Nagano H, Goi T, Taguchi S, Tsubaki T, Uematsu H. "Diagnosis of incarcerated intramesosigmoid hernia aided by multiplanar reconstruction images of multidetector computed tomography: a case report". *Surg Case Rep*. 2018;4(1):128. Published 2018 Oct 20. doi:10.1186/s40792-018-0535-z
71. Nihon-Yanagi Y, Ooshiro M, Osamura A, Takagi R, Moriyama A, Urita T, Yoshida Y, Tanaka H, Sugishita Y, Oshiro T, Kinoshita T, Nagashima M, Okazumi S. "Intersigmoid hernia: Report of a case". *Surg Today*. 2010;40(2):171-5. doi: 10.1007/s00595-009-4010-0. Epub 2010 Jan 28. Review. PubMed PMID: 20107960.
72. Nishida Y, Takahashi Y, Sasahara K. "Laparoscopically Treated Strangulated Ileus Due to an Intersigmoid Hernia". *Nihon Fukubu Kyukyu Igakkai Zasshi (Journal of Abdominal Emergency Medicine)*. 2013 Volume 33 Issue 1 91-94 DOI: <https://doi.org/10.11231/jaem.33.91>
73. Nitta H, Ishikawa F, Omoto H, Yamashita S, Suwa T. "Laparoscopic treatment for intramesosigmoid hernia-a case report". *Nihon Rinsho Geka Gakkai Zasshi (Journal of*

- Japan Surgical Association). 2006 Volume 67 Issue 10 2479-2484 DOI: <https://doi.org/10.3919/jjsa.67.2479>
74. Okada A, Yokota K, Itakura Y *et al.* "A case of intersigmoid hernia with characteristic computed tomography findings". Nihon Rinsho Geka Gakkai Zasshi (Journal of Japan Surgical Association). 2010 Volume 71 Issue 6 1624-1627 DOI: <https://doi.org/10.3919/jjsa.71.1624>
  75. Okutani D, Shien T, Soh J, Udaka T. "A case of strangulated ileus due to intramesosigmoid hernia". Nihon Rinsho Geka Gakkai Zasshi (Journal of Japan Surgical Association). 2001 Volume 62 Issue 3 817-820 DOI: [https://doi.org/10.3919/jjsa.62.3\\_817](https://doi.org/10.3919/jjsa.62.3_817)
  76. Oshima R, Minato E, Sakurau J *et al.* "A case of transmesosigmoid hernia". Nihon Rinsho Geka Gakkai Zasshi (Journal of Japan Surgical Association). 2010 Volume 71 Issue 3 839-843 DOI: <https://doi.org/10.3919/jjsa.71.839>
  77. Ota H, Yamazaki, Endoh W, Hojo S, Ueda N, Maeura Y. "A case of intramesosigmoid hernia invaginating into a mesenteric defect of the left peritoneal surface of the sigmoid mesentery". Nihon Rinsho Geka Gakkai Zasshi (Journal of Japan Surgical Association). 2005 Volume 66 Issue 3 770-773 DOI: <https://doi.org/10.3919/jjsa.66.770>
  78. Papanikolaou G, Alexiou GA, Mitsis M, Markouizos G, Kappas AM. "Congenital transmesosigmoid hernia: a rare case of pediatric small-bowel obstruction". *Pediatr Emerg Care.* 2008 Jul;24(7):471-3. doi: 10.1097/PEC.0b013e31817de2a4. PubMed PMID: 18633309.
  79. Perez Rouiz L, Gabarrell Oto A, Casals Garrigo R, Sola Marti R, Ziza F. "Intestinal obstruction caused by internal transmesosigmoid hernia: a complication of laparoscopic surgery?". *Minerva Chir.* 1997 Sep;52(9):1109-12. Italian. PubMed PMID: 9432585.
  80. Reddy, N. V. N., and Sunil Koushik. "A rare cause of internal herniation-Intermesocolic fossa of Brosike." *Journal of Medical & Allied Sciences* 5.1 (2015): 18.
  81. Sasaki T, Sakai K, Fukumori D, Sato M, Ohmori H, Yamamoto F. "Transmesosigmoid hernia: report of a case". *Surg Today.* 2002;32(12):1096-8. PubMed PMID: 12541031.
  82. Sasaki Y, Akashi S, Sugimori S, Yamada Y. "A Case of Transmesosigmoid Hernia Preoperatively Diagnosed". *Nihon Gekakei Rengo Gakkaishi (Journal of Japanese College of Surgeons).* 2017 Volume 42 Issue 1 122-126 DOI: <https://doi.org/10.4030/jjcs.42.122>
  83. Satomura H, Masuda N, Takita J, Mogami Y, Kato H "Two cases of intramesosigmoid hernia performed laparoscopic treatment". *Nihon Rinsho Geka Gakkai Zasshi (Journal of Japan Surgical Association)* 72(7):1870-1876 · January 2011 DOI: 10.3919/jjsa.72.1870
  84. Sawazaki S, Hayashi S, Tsuchida K *et al.* "A Case of Intramesosigmoid Hernia Diagnosed with Laparoscopy". *Nihon Gekakei Rengo Gakkaishi (Journal of Japanese College of Surgeons).* 2012 Volume 37 Issue 6 1221-1225 DOI: <https://doi.org/10.4030/jjcs.37.1221>
  85. Saxena, D., Shah, Y., Sahu, D., Sonarkar, R., Tandon M. "Strangulated Transmesosigmoid Hernia: A Rare Cause of Acute Abdomen". *Euroasian J Hepato-Gastroenterol* 2013;3(2): 139-141 doi: 10.5005/jp-journals-10018-1085

86. Shibahara K, Nakada K, Watanabe T, Sasaki M. "A case of intrasigmoid hernia". *Nihon Rinsho Geka Gakkai Zasshi (Journal of Japan Surgical Association)*. 1999 Volume 60 Issue 7 1926-1929 DOI: <https://doi.org/10.3919/jjsa.60.1926>
87. Shibuya N, Ishizuka M, Iwasaki Y, Takagi K, Nagata H, Aoki T, Kubota K. "Usefulness of a laparoscopic approach for treatment of small-bowel obstruction due to intersigmoid hernia: a case report". *Surg Case Rep*. 2017 Dec;3(1):22. doi: 10.1186/s40792-017-0298-y. Epub 2017 Feb 4. PubMed PMID: 28161873; PubMed Central PMCID: PMC5292108.
88. Shinoto K, Oshima I, Ariga T, Ozaki M. "A Case of Transmesosigmoid Hernia Diagnosed as Strangulated Ileus". *Nihon Fukubu Kyukyu Igakkai Zasshi (Journal of Abdominal Emergency Medicine)*. 2012 Volume 32 Issue 3 715-718 DOI: <https://doi.org/10.11231/jaem.32.715>
89. Shinto O, Kim E, Takatsuka S, Yui S, Ikehara T. "A case of intramesosigmoid hernia". *Nihon Rinsho Geka Gakkai Zasshi (Journal of Japan Surgical Association)*. 2005 Volume 66 Issue 4 871-875 DOI: <https://doi.org/10.3919/jjsa.66.871>
90. Siaperas P., Vallas Ch., Karanikas I. and Oikonomou N. "Incarcerated Transmesosigmoid Hernia Presenting in a 28-Year-Old Female" *Hellenic Journal of Surgery*, 2014, Volume 86, Number 3, Page 186 DOI: 10.1007/s13126-014-0125-x
91. Sogo Y, Fujiwara H, Yamasaki M, Okamoto T, Sakakua S, Tomiyoshi H, Ohyanagi H. "A case of intramesosigmoid hernia". *The Japanese Journal of Gastroenterological Surgery* 2001 Volume 34 Issue 9 1461-1465 DOI: <https://doi.org/10.5833/jjgs.34.1461>
92. Steele G Jr, Sawyer RB, Sawyer KC. "Retroperitoneal and transmesosigmoid herniation of ileum. Report of a case". *Rocky Mt Med J*. 1973 Jun;70(6):30-2. PubMed PMID: 4710725.
93. Sugimoto I, Kato R, Kazui H, Kitagawa S, Imamura Y, Hasegawa T, et al. "A case report of intersigmoid hernia". *J. Aichi Med. Univ. Assoc*. 1985; 13: 242-245
94. Tada M, Kanamaru H, Horie T, Odaka A, Murata M. "A Case Report of Intrasigmoid Hernia". *The Japanese Journal of Gastroenterological Surgery*. 1994 Volume 27 Issue 12 2605-2608 DOI: <https://doi.org/10.5833/jjgs.27.2605>
95. Takayanagi D, Mazaki T, Madou K, Ogame H, Ishii Y, Masuda H. "A case of intramesosigmoid hernia". *Nihon Rinsho Geka Gakkai Zasshi (Journal of Japan Surgical Association)*. 2010 Volume 71 Issue 6 1619-1623 DOI: <https://doi.org/10.3919/jjsa.71.1619>
96. Takeshita T, Ninoi T, Shigeoka H, Hirayama Y, Miki Y. "Small bowel obstruction due to an intramesosigmoid hernia diagnosed by multidetector row computed tomography: a case report". *Osaka City Med J*. 2010 Dec;56(2):37-45. PubMed PMID: 21466128.
97. Takikawa T, Negishi K, Kato T, Yamasaki H, Hattori M. "A case of internal hernia of the mesentery of the sigmoid colon presented with ileus". 2001 Volume 62 Issue 11 2819-2822 DOI: <https://doi.org/10.3919/jjsa.62.281>



98. Tanaka K, Yokoyama H, Hirata S *et al.* “An Emergency Operation in a Case of Ileus due to an Intersigmoid Hernia”. *Nihon Fukubu Kyukyu Igakkai Zasshi (Journal of Abdominal Emergency Medicine)*. 2014 Volume 34 Issue 7 1395-1399 DOI: <https://doi.org/10.11231/jaem.34.1395>
99. Taniguchi K, Iida R, Ota K, Asakuma M, Uchiyama K, Takasu A. “Single-port surgery (SPS) strategy for small bowel obstruction (SBO) caused by postoperative internal hernia: A series case report”. *Medicine (Baltimore)*. 2018 Mar;97(13): e0269. doi: 10.1097/MD.000000000010269. PubMed PMID: 29595689; PubMed Central PMCID: PMC5895389.
100. Teruya T, Takaesu Y, Hokama A, Nohara M, Muto Y. “Intramesosigmoid Hernia-a case report”. *Nihon Rinsho Geka Gakkai Zasshi (Journal of Japan Surgical Association)*. 1998 Volume 59 Issue 5 1401-1404 DOI <https://doi.org/10.3919/jjsa.59.1401>
101. Toyoda S, Ichikawa T, Imagawa A *et al.* “Two Cases of Intersigmoid Hernia Treated with Laparoscopic Surgery”. *Nihon Gekakei Rengo Gakkaishi (Journal of Japanese College of Surgeons)*. 2013 Volume 38 Issue 1 178-183 DOI: <https://doi.org/10.4030/jjcs.38.178>
102. Tsukahara T, Yamaguchi A, Isogai M *et al.* “Two cases of intersigmoid hernia diagnosed preoperatively”. *Nihon Rinsho Geka Gakkai Zasshi (Journal of Japan Surgical Association)*. 2008 Volume 69 Issue 3 676-681 DOI: <https://doi.org/10.3919/jjsa.69.676>
103. Van der Mieren G, de Gheldere C, Vanclooster P. “Transmesosigmoid hernia: report of a case and review of the literature”. *Acta Chir Belg*. 2005 Nov-Dec;105(6):653-5. Review. PubMed PMID: 16438079.
104. Waku T, Watanabe K, Tomioka N, Orita Y. “Two Cases of Incarcerated Internal Hernia”. *The Japanese Journal of Gastroenterological Surgery*. 2005 Volume 38 Issue 5 545-548 DOI: <https://doi.org/10.5833/jjgs.38.545>
105. Watanabe M, Mitsumori N, Shida A *et al.* “A Case Report of Intramesosigmoid Hernia Treated with Laparoscopy”. *The Japanese Journal of Gastroenterological Surgery*. 2003 Volume 36 Issue 4 309-313 DOI: <https://doi.org/10.5833/jjgs.36.309>
106. Watanabe M, Morioka J. “A Case of Intramesosigmoid Hernia Diagnosed by Computed Tomography and Treated with Laparoscope”. *Nihon Gekakei Rengo Gakkaishi (Journal of Japanese College of Surgeons)*. 2015 Volume 40 Issue 6 1189-1194 DOI: <https://doi.org/10.4030/jjcs.40.1189>
107. Watanabe T, Wada H, Sato M, Miyaki Y, Shiiya N. “Single-incision laparoscopic surgery for intersigmoid hernia”. *Case Rep Surg*. 2014;2014:589649. doi: 10.1155/2014/589649. Epub 2014 Nov 19. PubMed PMID: 25506032; PubMed Central PMCID: PMC4258357.
108. Yang C, Kim D. “Small bowel obstruction caused by sigmoid mesocolic hernia”. *J Surg Case Rep*. 2014 May 2;2014(5). pii: rju036. doi: 10.1093/jscr/rju036. Print 2014 May. PubMed PMID: 24876507; PubMed Central PMCID: PMC4207257.
109. Yang MS, Yeh DM, Lin SS, Chang CC, Wu MM, Chao C, Tyan YS. “Computed tomographic appearance of internal herniation through the sigmoid mesocolon”. *J Chin Med Assoc*. 2005 Apr;68(4):195-7 PubMed PMID: 15850072.
110. Yang WL, Zhang DW, Zhang HG. “Diagnosis and treatment of adult congenital transmesentery hernia”. *Zhongguo Weichang Waikē Zazhi* 2010; 13: 621-622

111. Yao YF, Zhang MF. "Ultrasonic manifestations of congenital transmesosigmoid hernia: report of one case". *Zhongguo Linchang Yixue Yingxiang Zazhi* 2012; 23: 149-150
112. Yazawa T, Shimizu T, Mekata E, Sonoda H, Tatsuta T, Tani T. "A case of intersigmoid hernia diagnosed preoperatively". *Nihon Rinsho Geka Gakkai Zasshi (Journal of Japan Surgical Association)* 2011 Volume 72 Issue 10 2676-2680 DOI: <https://doi.org/10.3919/jjsa.72.2676>
113. Yu CY, Lin CC, Yu JC, Liu CH, Shyu RY, Chen CY. "Strangulated transmesosigmoid hernia: CT diagnosis". *Abdom Imaging*. 2004 Mar-Apr;29(2):158-60. PubMed PMID: 15290938.
114. Zhang JS, Luo RH, Gao XY. "Congenital transmesosigmoid hernia causing small bowel strangulation, case report". *Binzhou Yixueyuan Xuebao* 1995; 5: 46
115. Zhou FZ, Zhou ZQ, Chen HL, Chen DH, Chen WM, Wu YP. "Five cases of mesentery defect causing hernia in schizophrenia patients". *Zhengjiang Chuangshang Waike* 2007; 12: 272-273

SDC 2. Table 2: Characteristics of included studies.

| <b>References</b> | <b>Imaging before operation</b> | <b>Abdominal X-ray Contrast study of SI</b>           | <b>Abdominal CT</b> | <b>MDCT</b> | <b>Abdominal US</b> |
|-------------------|---------------------------------|-------------------------------------------------------|---------------------|-------------|---------------------|
| Benson 1964       | AXR                             | “distention of two loops of SB with air-fluid levels” | NP                  | NP          | NP                  |
| Steele 1973       | AXR                             | “dilated SBL with multiple air-fluid levels”          | NP                  | NP          | NP                  |
| Fujioka 1976      | AXR                             | NR                                                    | NP                  | NP          | NP                  |
| Bircher 1981      | AXR                             | “Multiple air fluid levels, dilated SB”               | NP                  | NP          | NP                  |
| Li 1982           | AXR                             | “Multiple air fluid levels, dilated SBL”              | NP                  | NP          | NP                  |
| Li 1985           | AXR                             | “Multiple air fluid levels, dilated SBL”              | NP                  | NP          | NP                  |
| Sugimoto 1985     | AXR                             | “air and fluid levels in SB”                          | NP                  | NP          | NP                  |
| Matsuda 1989      | AXR                             | “distended SB with air-fluid levels”                  | NP                  | NP          | NP                  |
| Mo 1991           | AXR                             | “Multiple, dilated SBL”                               | NP                  | NP          | NP                  |

|               |           |                                              |                                                          |    |                                                |
|---------------|-----------|----------------------------------------------|----------------------------------------------------------|----|------------------------------------------------|
| Johnson 1992  | AXR       | “dilated SBL with multiple air-fluid levels” | NP                                                       | NP | NP                                             |
| Tada 1994     | AXR       | “Distended SB with air-fluid levels”         | NP                                                       | NP | NP                                             |
| Zhang 1995    | AXR       | “Multiple air fluid levels, dilated SBL”     | NP                                                       | NP | NP                                             |
| Luo 1996      | AXR       | “Multiple niveau with dilated SBL”           | NP                                                       | NP | NP                                             |
| Murakami 1996 | AXR       | “Dilated SBL”                                | NP                                                       | NP | NP                                             |
| Perez 1997    | AXR, US   | “dilated SB with multiple air fluid levels”  | NP                                                       | NP | “dilated SBL with free intraperitoneal liquid” |
| Ido 1998      | AXR, ACT  | “dilated SI with air-fluid levels”           | “SI obstruction and retroperitoneal abscess”             | NP | NP                                             |
| Igarashi 1998 | CCSI, ACT | “air and fluid levels in SB”                 | “stenotic portion of the ileum in the sigmoid mesocolon” | NP | NP                                             |
| Kaneko 1998   | AXR, ACT  | “dilatation of SI gas image”                 | “Dilated SBL”                                            | NP | NP                                             |
| Teruya 1998   | AXR, ACT  | “Dilated SBL”                                | “Dilated SBL”                                            | NP | NP                                             |
| He 1999       | AXR       | “Multiple air-fluid levels”                  | NP                                                       | NP | NP                                             |

|                    |                      |                                                                  |                                                                      |    |    |
|--------------------|----------------------|------------------------------------------------------------------|----------------------------------------------------------------------|----|----|
| Shibahara<br>1999  | AXR,<br>ACT          | “niveau in the SI”                                               | “dilated SB”                                                         | NP | NP |
| Kobayashi<br>2000  | AXR,<br>CSSI         | “Diffuse SB gas<br>with air-fluid,<br>smooth narrowing<br>of SB” | NP                                                                   | NP | NP |
| Endo 2001          | CSSI,<br>ACT         | “stenosis”                                                       | “SB included in the SM”                                              | NP | NP |
| Okutani<br>2001    | AXR,<br>ACT          | “multiple niveau”                                                | “Ascites and dilatation of SI”                                       | NP | NP |
| Sogo 2001          | AXR,<br>CSSI         | “ air fluid levels,<br>stenosis”                                 | NP                                                                   | NP | NP |
| Takikawa<br>2001   | AXR,<br>ACT          | “air-fluid levels”                                               | “intussusception of the SI”                                          | NP | NP |
| Maruyama<br>2002   | AXR                  | “ SI gas and fluid”                                              | NP                                                                   | NP | NP |
| Sasaki<br>2002     | AXR,<br>ACT          | “distended SBL and<br>niveau formation”                          | “very dilated SI loops with<br>obstruction in the terminal<br>ileum” | NP | NP |
| Katayanagi<br>2003 | AXR,<br>CSSI,<br>ACT | “SB gas with air-<br>fluid”<br>“2 smooth<br>narrowing”           | “dilatation and stenosis of SB”                                      | NP | NP |
| Watanabe<br>2003   | AXR                  | “Dilated SI, air-<br>fluid levels”                               | NP                                                                   | NP | NP |
| Akiyama<br>2004    | AXR,<br>CSSI,<br>ACT | “SB gas, stenosis”                                               | “dilated SI at the pelvic space”                                     | NP | NP |

|                     |                |                                 |                                                                                      |    |                          |
|---------------------|----------------|---------------------------------|--------------------------------------------------------------------------------------|----|--------------------------|
| Koinuma 2004        | CSSI, ACT      | “dilatation and stenosis”       | “small bowel wall was partially thickened”                                           | NP | NP                       |
| Motohiro 2004       | AXR, ACT, AUS  | “dilatation and gas in the SI”  | “small bowel situated in the SM”                                                     | NP | “Ascites, keyboard sign” |
| Yu 2004             | ACT            | NR                              | “A cluster of dilated, fluid-filled, U- and C-shaped loops of SB”                    | NP | NP                       |
| Maruyama 2005       | AXR, CSSI, ACT | “Air- fluid levels, stenosis”   | “Ileum stenosis in the pelvis”                                                       | NP | NP                       |
| Mitsui 2005         | ACT            | NP                              | “ incarcerated SBL”                                                                  | NP | NP                       |
| Nachi 2005          | AXR, ACT       | “Ileus”                         | “tapered obstruction of SI in the left side of lower abdomen”                        | NP | NP                       |
| Ota 2005            | AXR, ACT       | “Multiple niveaus of the SB”    | “Dilated SB”                                                                         | NP | NP                       |
| Shinto 2005         | AXR, ACT       | “SI gas with air- fluid levels” | “Dilated SBL”                                                                        | NP | NP                       |
| Van der Mieren 2005 | AXR, ACT       | NR                              | NR                                                                                   | NP | NP                       |
| Waku 2005           | CSSI, AXR      | “Obstruction of SI at the SM”   | “Obstruction of SI at the lower abdomen”                                             | NP | NP                       |
| Yang 2005           | ACT            | NP                              | “A short segment of SBL with thickened and edematous wall at the left-lower abdomen” | NP | NP                       |

|                   |                      |                                                         |                                                                                                |    |                                               |
|-------------------|----------------------|---------------------------------------------------------|------------------------------------------------------------------------------------------------|----|-----------------------------------------------|
| Hoshikawa 2006    | AXR,<br>ACT          | “Gas in the SI”                                         | “remarkable dilatation of the entire SI”                                                       | NP | NP                                            |
| Nitta 2006        | AXR,<br>ACT          | “Dilated SB”                                            | “dilatation of SB”                                                                             | NP | NP                                            |
| Isobe 2007        | AXR,<br>CSSI,<br>ACT | “Dilated and stenotic SB”                               | “Dilated SB”                                                                                   | NP | NP                                            |
| Zhou 2007         | ACT                  | NP                                                      | “dilated SBL and collapsed distal SB”                                                          | NP | NP                                            |
| Collins 2008      | AXR,<br>ACT          | “two prominent loops of SB in the right lower quadrant” | “dilated loops of SB with a zone of transition approximately 10 cm from the ileo-caecal valve” | NP | NP                                            |
| Hibino 2008       | AXR,<br>ACT          | “Dilated SB”                                            | “Ascites and dilated SBL”                                                                      | NP | NP                                            |
| Papanikolaou 2008 | US                   | NP                                                      | NP                                                                                             | NP | “dilated SB with free intraperitoneal liquid” |
| Tsukahara 2008    | CSSI,<br>ACT<br>ACT  | “Stenosis at the ileum”<br>NP                           | “Incarcerated SBL in sigmoid mesocolon”<br>“ expanded discontinuous SB around the SM”          | NP | NP                                            |
| Bao SQ 2009       | CT                   | NP                                                      | “dilated SB and collapsed distal SB”                                                           | NP | NP                                            |
| Kan 2009          | AXR,<br>ACT          | “SB gas with niveau formation”                          | “2 strictures in SB separated by approximately 10 cm”                                          | NP | NP                                            |
| Murata 2009       | ACT                  | NP                                                      | “dilated SB and collapsed distal SB”                                                           | NP | NP                                            |

|                   |                      |                                                       |                                                                                                  |                                 |    |
|-------------------|----------------------|-------------------------------------------------------|--------------------------------------------------------------------------------------------------|---------------------------------|----|
| Moriyama 2010     | ACT                  | NP                                                    | “SB dilated and ascites”                                                                         | NP                              | NP |
| Nihon-yanagi 2010 | AXR,<br>ACT          | “Prominent SB gas”                                    | “wall thickening of the edematous, fluid-filled ileum in the left iliac fossa and pelvic cavity” | NP                              | NP |
| Okada 2010        | AXR,<br>CSSI,<br>ACT | “Dilated SB, niveau formation”                        | “Dilated SI in the left side of SM”                                                              | NP                              | NP |
| Oshima 2010       | AXR,<br>ACT          | “Dilated SI, air-fluid levels”                        | SBL with poorly enhanced wall”                                                                   | NP                              | NP |
| Takayanagi 2010   | AXR,<br>ACT          | “dilated SB, multiple niveau”                         | “dilated SB and a stenotic portion”                                                              | NP                              | NP |
| Takeshita 2010    | AXR,<br>ACT          | “Dilatation and an air-fluid level of SB”             | NP                                                                                               | “dilated SBL, a sac-like mass ” | NP |
| Yang WL 2010      | CT                   | NR                                                    | “dilated SBL and collapsed distal SB”                                                            | NR                              | NR |
| Agarwal 2011      | AXR                  | “Multiple air-fluid levels”                           | NP                                                                                               | NP                              | NP |
| Guo 2011          | CT                   | NP                                                    | “ascites, dilated SBL and intestinal wall tickening”                                             | NP                              | NP |
| Harrison 2011     | AXR,<br>ACT          | “dilated stomach and SB loops”                        | “dilated loops of proximal SB with normal distal SB”                                             | NP                              | NP |
| Jimmy 2011        | AXR,<br>ACT          | “Single dilated loop of SB in the left lower abdomen” | “Dilated SBL with a cut-off at the level of mid-ileum”                                           | NP                              | NP |



|                  |                                           |                                                                    |                                                                                                                                                                              |                |                |
|------------------|-------------------------------------------|--------------------------------------------------------------------|------------------------------------------------------------------------------------------------------------------------------------------------------------------------------|----------------|----------------|
| Kohga<br>2011    | ACT                                       | NP                                                                 | “bird-beak sign in the lower left quadrant with proximal intestine dilatation”                                                                                               | NP             | NP             |
| Michiko<br>2011  | AXR,<br>ACT                               | “multiple air fluid levels”<br>“multiple air fluid levels”         | “SI obstruction of the left lower quadrant”<br>“SI obstruction in the pelvic cavity”                                                                                         | NP<br>NP       | NP<br>NP       |
| Satomura<br>2011 | AXR,<br>ACT<br><br>AXR,<br>ACT            | “ dilated SI and a few colon gas”<br>“ SB gas and a few colon gas” | “SI has been incarcerated like “eight figure” behind the mesentery of sigmoid colon”<br>“SI has been incarcerated like “eight figure” behind the mesentery of sigmoid colon” | NP<br><br>NP   | NP<br><br>NP   |
| Yazawa<br>2011   | AXR,<br>ACT                               | “SI gas”                                                           | “closed loop of the SI in sigmoid colon”                                                                                                                                     | NP             | NP             |
| Kim 2012         | AXR,<br>ACT                               | “mild ileus without prominent dilation of SB”                      | “ascites, dilated SBL and intestinal wall thickening”                                                                                                                        | NP             | NP             |
| Koshino<br>2012  | AXR,<br>ACT                               | “SI dilated”                                                       | “Dilatation of SI”                                                                                                                                                           | NP             | NP             |
| Sawazaki<br>2012 | AXR,<br>ACT                               | “dilatation and stenosis”                                          | “dilatation and stenosis of SB”                                                                                                                                              | NP             | NP             |
| Shinoto<br>2012  | AXR,<br>CSSI,<br>ACT                      | NR                                                                 | “incarcerated SBL in the lateral position of SM”                                                                                                                             | NP             | NP             |
| Yao 2012         | US                                        | NP                                                                 | NP                                                                                                                                                                           | NP             | “Dilated SBL”  |
| Miura<br>2013    | AXR,<br>ACT<br>AXR,<br>ACT<br>AXR,<br>ACT | “Multiple niveau in SI”<br>“Gas in the SI”<br>Gas in the SI”       | “dilated and thickened SI, beak sign”<br>“dilated and thickened SI”<br>“distended SI in the SM, closed loop in LLQ”                                                          | NP<br>NP<br>NP | NP<br>NP<br>NP |

|               |                                    |                                                   |                                                                                                 |          |                            |
|---------------|------------------------------------|---------------------------------------------------|-------------------------------------------------------------------------------------------------|----------|----------------------------|
| Nishida 2013  | ACT                                | NP                                                | “Loop-shaped small bowel in LLQ”                                                                | NP       | NP                         |
| Saxena 2013   | AXR,<br>US                         | “dilated SB loops with multiple air fluid levels” | NP                                                                                              | NP       | “Dilated SBL”              |
| Toyoda 2013   | AXR,<br>ACT,<br>AUS<br>AXR,<br>ACT | “dilated SI”<br>“Air-fluid levels in the SB”      | “cystic mass, dilation and narrowing of the SB”<br>“closed loop an area of narrowing of the SB” | NP<br>NP | “Cystic mass in LLQ”<br>NP |
| Bandawar 2014 | AXR                                | “dilated SB loops with multiple air fluid levels” | NP                                                                                              | NP       | NP                         |
| Fukuzawa 2014 | AXR,<br>CSSI,<br>ACT               | “dilated SI with niveau”                          | Dilated SI and obstruction of SI in the SM”                                                     | NP       | NP                         |
| Furukawa 2014 | CCSI,<br>ACT                       | “dilated SB and stenosis”                         | “ascites around the liver and incarcerated SB”                                                  | NP       | NP                         |
| Hori 2014     | AXR,<br>ACT                        | “Dilated SB, niveau”                              | “localized SI dilation ait the dorsal of SM”                                                    | NP       | NP                         |
| Li 2014       | ACT                                | NP                                                | “dilated SBL with multiple air fluid levels and collapsed distal SB”                            | NP       | NP                         |
| Mandava 2014  | AXR,<br>ACT                        | “Multiple niveau, dilated SB”                     | “Dilated SBL with bird beak appearance”                                                         | NP       | NP                         |
| Siaperas 2014 | AXR,<br>ACT                        | “Dilatation and an air-fluid level of SB”         | “distended stomach and SBL with the presence of fluid in the lesser pelvis”                     | NP       | NP                         |
| Tanaka 2014   | AXR,<br>ACT                        | “niveau in the SI”                                | “ascites, dilation of the SI with a closed loop at the dorsal surface of SM”                    | NP       | NP                         |

|               |          |                                                        |                                                                         |    |    |
|---------------|----------|--------------------------------------------------------|-------------------------------------------------------------------------|----|----|
| Watanabe 2014 | AXR, ACT | “Dilatation and an air-fluid level of SB”              | “Extensively dilated SB and a closed loop of SB in the mesosigmoid”     | NP | NP |
| Yang 2014     | AXR, ACT | “slight distension of SB with air-fluid level”         | “dilated SBL”                                                           | NP | NP |
| Campbell 2015 | AXR, ACT | “Multiple dilated loops of SB”                         | “a dilated proximal SB with a transition point in the left iliac fossa” | NP | NP |
| Farah 2015    | AXR, ACT | “2 prominent loops of SB in the left lower quadrant”   | “SI dilatation with free fluid level”                                   | NP | NP |
| Hirata 2015   | AXR, ACT | NR                                                     | NR                                                                      | NP | NP |
| Horii 2015    | AXR, ACT | “small mass in LLQ”                                    | “dilated loops of SI, ascetic fluid in pelvis”                          | NP | NP |
| Ishita 2015   | AXR, ACT | “dilatation of SI”                                     | “enlargement of the SI and ascites“                                     | NP | NP |
| Kuroda 2015   | ACT      | NP                                                     | “dilatation of SI and stenosis of pelvic tract”                         | NP | NP |
| Reddy 2015    | AXR      | “Multiple air fluid levels on the right lower abdomen” | NP                                                                      | NP | NP |
| Shukla 2015   | AXR, ACT | “Multiple air fluid levels and dilated SB loops”       | “dilated SBL with minimal interloop fluid”                              | NP | NP |
| Watanabe 2015 | ACT      | NP                                                     | “incarcerated intestine like a 8 figure”                                | NP | NP |

|                   |                      |                                                           |                                                                                                  |                                       |    |
|-------------------|----------------------|-----------------------------------------------------------|--------------------------------------------------------------------------------------------------|---------------------------------------|----|
| Benyamini<br>2016 | ACT                  | NP                                                        | “Mildly dilated thin-walled small bowel in the mid-abdomen and pelvis”                           | NP                                    | NP |
| Hattori<br>2016   | AXR,<br>ACT          | “a distended SB”                                          | “loop of the SI with proximal dilatation”                                                        | NP                                    | NP |
| Iwasaki<br>2016   | ACT                  | “dilation and local narrowing in the left lower quadrant” | NP                                                                                               | NP                                    | NP |
| Kheok<br>2016     | AXR,<br>ACT          | “Dilation of SBL and multiple air fluid levels”           | “C-shaped appearance of the dilated SB with mesenteric engorgement and fat stranding”            | NP                                    | NP |
| Kojima<br>2016    | AXR,<br>ACT          | “Dilatation and an air-fluid level of SB”                 | extensively dilated SB and a closed loop of small bowel in the pelvis, with no signs of adhesion | NP                                    | NP |
| Kumagai<br>2016   | AXR,<br>ACT,<br>MDCT | “Diffuse dilatation of the SB”                            | “dilated SBL”                                                                                    | “narrowing and wall thickening of SI” | NP |
| Matsui<br>2016    | AXR,<br>ACT          | “dilated SB”                                              | “stenosis of SI in the left lower abdomen”                                                       | NP                                    | NP |
| Agatsuma<br>2017  | ACT                  | NP                                                        | “dilation SI, bowel wall thickening and the closed loop sign”                                    | NP                                    | NP |
| Ahmad<br>2017     | AXR                  | “4-5 air-fluid levels without much bowel dilatation”      | NP                                                                                               | NP                                    | NP |

|                |             |                                             |                                                                                                  |                                             |    |
|----------------|-------------|---------------------------------------------|--------------------------------------------------------------------------------------------------|---------------------------------------------|----|
| Chou 2017      | ACT         | NP                                          | “long small bowel segment traversing dorsal to the sigmoid colon to left lower abdomen”          | NP                                          | NP |
| Hayama 2017    | AXR,<br>ACT | “dilatation of SI with niveau”              | “dilation of SI”                                                                                 | NP                                          | NP |
| Hirashima 2017 | AXR,<br>ACT | “A large amount of gas in the SI”           | “Stenosis of SI in the LLQ, dilation on the dorsal side of the sigmoid colon”                    | NP                                          | NP |
| Kayano 2017    | AXR,<br>ACT | “A large amount of gas in small intestine”  | “Stenosis of SI in the left lower abdomen and dilation on the dorsal side of the sigmoid colon”  | NP                                          | NP |
|                | AXR,<br>ACT | “Dilatation of the SI with multiple niveau” | “SI extending in the shape of the figure 8 in the left lower abdomen”                            | NP                                          | NP |
| Kishi 2017     | AXR,<br>ACT | NR                                          | “wall thickening of the edematous, fluid-filled ileum in the left iliac fossa and pelvic cavity” | NP                                          | NP |
| Sasaki 2017    | AXR,<br>ACT | Dilatation of SB”                           | “Dilatation of SI herniated in the SM”                                                           | NP                                          | NP |
| Shibuya 2017   | AXR,<br>ACT | “Dilatation of SB”                          | “obstruction of the SB in the left lower abdomen with SB dilatation on the oral side”            | NP                                          | NP |
| Nagano 2018    | MDCT        | NP                                          | NP                                                                                               | “incarcerated SBL in the left pelvic space” | NP |
| Taniguchi 2018 | ACT         | NP                                          | “A closed loop obstruction around sigmoid colon”                                                 | NP                                          | NP |

SDC 3. Table 3: Radiological evaluation of included studies.

| <b>References</b> | <b>Duration of the procedure</b> | <b>Diameter of defect (cm)</b> | <b>Length of incarcerated small bowel (cm)</b> | <b>Adhesions of herniated ileum at the hernial orifice</b> | <b>Type of adhesion</b> |
|-------------------|----------------------------------|--------------------------------|------------------------------------------------|------------------------------------------------------------|-------------------------|
| Benson 1964       | NR                               | 2                              | 15                                             | NR                                                         | NR                      |
| Steele 1973       | NR                               | 2                              | NR                                             | NR                                                         | NR                      |
| Fujioka 1976      | NR<br>NR                         | 2,5<br>1,5                     | 3<br>5                                         | NR<br>NR                                                   | NR<br>NR                |
| Bircher 1981      | NR<br>NR                         | NR<br>NR                       | NR<br>NR                                       | NR<br>NR                                                   | NR<br>NR                |
| Li 1982           | NR                               | 4                              | NR                                             | NR                                                         | NR                      |
| Li 1985           | NR                               | 2                              | NR                                             | NR                                                         | NR                      |
| Sugimoto 1985     | NR                               | 3                              | 15                                             | NR                                                         | NR                      |
| Matsuda 1989      | NR                               | 3                              | 10                                             | NR                                                         | NR                      |
| Mo 1991           | NR                               | 3                              | NR                                             | NR                                                         | NR                      |
| Johnson 1992      | NR                               | 5                              | NR                                             | NR                                                         | NR                      |
| Tada 1994         | NR                               | 2                              | 10                                             | NR                                                         | NR                      |
| Zhang 1995        | NR                               | 3                              | NR                                             | NR                                                         | NR                      |
| Luo 1996          | NR                               | 3                              | NR                                             | NR                                                         | NR                      |
| Murakami 1996     | NR                               | 1,5                            | 5                                              | NR                                                         | NR                      |

|                    |          |          |          |           |            |
|--------------------|----------|----------|----------|-----------|------------|
| Perez 1997         | NR       | NR       | NR       | NR        | NR         |
| Ido 1998           | NR       | 1        | NR       | NR        | NR         |
| Igarashi 1998      | NR       | 2,1      | 7,5      | NR        | NR         |
| Kaneko 1998        | NR       | 2,5      | 150      | NR        | NR         |
| Teruya 1998        | NR       | 1,5      | 10       | NR        | NR         |
| He 1999            | NR       | 3        | NR       | NR        | NR         |
| Shibahara 1999     | NR       | 1,5      | NR       | NR        | NR         |
| Kobayashi 2000     | NR       | 2<br>2   | 20<br>10 | Yes<br>No | Mild<br>NR |
| Endo 2001          | NR       | 2        | 130      | NR        | NR         |
| Okutani 2001       | NR       | 10       | 70       | NR        | NR         |
| Sogo 2001          | NR       | 3        | NR       | NR        | NR         |
| Takikawa 2001      | NR       | 2        | 70       | NR        | NR         |
| Maruyama 2002      | NR<br>NR | 3<br>2,5 | 5<br>5   | NR<br>NR  | NR<br>NR   |
| Sasaki 2002        | NR       | 3,5      | 30       | NR        | NR         |
| Katayanagi<br>2003 | NR       | 3        | 15       | NR        | NR         |
| Watanabe 2003      | NR       | NR       | 10       | NR        | NR         |
| Akiyama 2004       | NR       | 2        | 4        | NR        | NR         |
| Koinuma 2004       | NR       | 2        | NR       | NR        | NR         |

|                        |          |        |          |          |          |
|------------------------|----------|--------|----------|----------|----------|
| Motohiro 2004          | NR       | 5      | 50       | NR       | NR       |
| Yu 2004                | NR       | 5      | NR       | NR       | NR       |
| Maruyama 2005          | NR       | 2,5    | NR       | NR       | NR       |
| Mitsui 2005            | NR       | 3      | 15       | NR       | NR       |
| Nachi 2005             | NR       | 2,5    | 10       | NR       | NR       |
| Ota 2005               | NR       | 3      | NR       | NR       | NR       |
| Shinto 2005            | NR       | 2      | NR       | NR       | NR       |
| Van der Mieren<br>2005 | NR       | NR     | NR       | NR       | NR       |
| Waku 2005              | NR       | 2,5    | NR       | NR       | NR       |
| Yang 2005              | NR       | NR     | 20       | NR       | NR       |
| Hoshikawa<br>2006      | NR       | 2      | NR       | NR       | NR       |
| Nitta 2006             | NR       | 2,5    | NR       | NR       | NR       |
| Isoe 2007              | NR       | 3      | 4        | NR       | NR       |
| Zhou 2007              | NR       | 3      | NR       | NR       | NR       |
| Collins 2008           | NR       | 4      | NR       | NR       | NR       |
| Hibino 2008            | NR       | 3      | 40       | NR       | NR       |
| Papanikolaou<br>2008   | NR       | 5      | NR       | NR       | NR       |
| Tsukahara 2008         | NR<br>NR | 3<br>2 | 10<br>20 | NR<br>NR | NR<br>NR |



|                   |                          |          |          |          |          |
|-------------------|--------------------------|----------|----------|----------|----------|
| Bao SQ 2009       | NR                       | 3        | NR       | NR       | NR       |
| Kan 2009          | NR                       | 4        | NR       | NR       | NR       |
| Murata 2009       | NR                       | 2        | 4        | NR       | NR       |
| Moriyama 2010     | NR                       | 2        | 15       | NR       | NR       |
| Nihon-Yanagi 2010 | NR                       | 3        | NR       | Yes      | NR       |
| Okada 2010        | NR                       | 1,5      | 10       | NR       | NR       |
| Oshima 2010       | NR                       | 1        | 10       | NR       | NR       |
| Takayanagi 2010   | NR                       | 2        | NR       | NR       | NR       |
| Takeshita 2010    | NR                       | 2,5      | 20       | NR       | NR       |
| Yang WL 2010      | NR<br>NR                 | 5<br>4   | NR<br>NR | NR<br>NR | NR<br>NR |
| Agarwal 2011      | NR                       | 1,8      | 15       | NR       | NR       |
| Guo 2011          | NR                       | 4        | NR       | NR       | NR       |
| Harrison 2011     | NR                       | NR       | NR       | NR       | NR       |
| Jimmy 2011        | NR                       | 2        | NR       | NR       | NR       |
| Kohga 2011        | NR                       | 3        | NR       | NR       | NR       |
| Michiko 2011      | NR<br>NR                 | 1,5<br>2 | 7<br>NR  | NR<br>NR | NR<br>NR |
| Satomura 2011     | 65 minutes<br>59 minutes | 4<br>3   | 8<br>10  | NR<br>NR | NR<br>NR |

|               |                |               |                |                |                |
|---------------|----------------|---------------|----------------|----------------|----------------|
| Yazawa 2011   | NR             | 1,5           | 10             | No             | NR             |
| Kim 2012      | NR             | 3             | 150            | Yes            | Mild           |
| Koshino 2012  | NR             | 2             | 10             | NR             | NR             |
| Sawazaki 2012 | NR             | 2             | 10             | Yes            | Mild           |
| Shinoto 2012  | NR             | 2             | 150            | NR             | NR             |
| Yao 2012      | NR             | 4             | NR             | NR             | NR             |
| Miura 2013    | NR<br>NR<br>NR | 2<br>3<br>1,5 | NR<br>NR<br>15 | NR<br>NR<br>NR | NR<br>NR<br>NR |
| Nishida 2013  | NR             | 2             | 10             | NR             | NR             |
| Saxena 2013   | NR             | 4             | 50             | NR             | NR             |
| Toyoda 2013   | NR<br>NR       | 2<br>1        | 20<br>75       | NR<br>NR       | NR<br>NR       |
| Bandawar 2014 | NR             | 2             | 25             | NR             | NR             |
| Fukuzawa 2014 | 44 minutes     | NR            | NR             | NR             | NR             |
| Furukawa 2014 | NR             | 2             | 10             | NR             | NR             |
| Hori 2014     | NR             | 3             | NR             | NR             | NR             |
| Li 2014       | 40 minutes     | 2,5           | 15             | NR             | NR             |
| Mandava 2014  | NR             | NR            | NR             | NR             | NR             |
| Siaperas 2014 | NR             | 3             | NR             | NR             | NR             |

|                |            |     |    |     |      |
|----------------|------------|-----|----|-----|------|
| Tanaka 2014    | NR         | 2   | 5  | Yes | NR   |
| Watanabe 2014  | NR         | 3   | 10 | Yes | Mild |
| Yang 2014      | NR         | 2   | 15 | NR  | NR   |
| Campbel 2015   | 60 minutes | 3   | 6  | NR  | NR   |
| Farah 2015     | NR         | 4,5 | NR | NR  | NR   |
| Hirata 2015    | NR         | 2   | NR | NR  | NR   |
| Horii 2015     | NR         | 2   | 30 | NR  | NR   |
| Ishita 2015    | NR         | 2   | NR | NR  | NR   |
| Kuroda 2015    | NR         | 3   | 10 | NR  | NR   |
| Reddy 2015     | NR         | NR  | NR | NR  | NR   |
| Shukla 2015    | NR         | 2   | NR | NR  | NR   |
| Watanabe 2015  | NR         | 3   | 15 | NR  | NR   |
| Benyamini 2016 | NR         | 2   | NR | NR  | NR   |
| Hattori 2016   | NR         | 2   | 5  | NR  | NR   |
| Iwasaki 2016   | NR         | 2   | 10 | NR  | NR   |
| Kheok 2016     | NR         | 3   | 10 | NR  | NR   |
| Kojima 2016    | NR         | NR  | 15 | NR  | NR   |
| Kumagai 2016   | NR         | NR  | NR | NR  | NR   |
| Matsui 2016    | NR         | 2   | 5  | NR  | NR   |

|                |             |                |     |     |        |
|----------------|-------------|----------------|-----|-----|--------|
| Agatsuma 2017  | NR          | “small defect” | 30  | NR  | NR     |
| Ahmad 2017     | NR          | 2,5            | 8   | NR  | NR     |
| Chou 2017      | NR          | NR             | 10  | NR  | NR     |
| Hayama 2017    | NR          | 2,5            | 10  | NR  | NR     |
| Hirashima 2017 | NR          | NR             | 100 | NR  | NR     |
| Kayano 2017    | 139 minutes | NR             | NR  | Yes | Severe |
| Kayano 2017    | 84 minutes  | NR             | NR  | NR  | NR     |
| Kishi 2017     | NR          | NR             | 50  | NR  | NR     |
| Sasaki 2017    | NR          | 1,5            | NR  | NR  | NR     |
| Shibuya 2017   | 108 minutes | NR             | NR  | Yes | Mild   |
| Nagano 2018    | NR          | 2              | 6   | NR  | NR     |
| Taniguchi 2018 | 76 minutes  | NR             | NR  | Yes | NR     |

SDC 4. Table 4: Intraoperative findings

| References    | Nation  | Number of patients | Age/sex          | Clinical Signs and symptoms | History of surgery or inflammation |
|---------------|---------|--------------------|------------------|-----------------------------|------------------------------------|
| Benson 1964   | USA     | 1                  | 42/F             | SBO                         | No                                 |
| Steele 1973   | USA     | 1                  | 49/F             | SBO                         | Hysterectomy                       |
| Fujioka 1976  | Japan   | 2                  | 61/M<br>50/M     | SBO<br>SBO                  | No<br>No                           |
| Bircher 1981  | England | 2                  | 68/F<br>68/F     | SBO<br>SBO                  | No<br>Hysterectomy                 |
| Li 1982       | China   | 1                  | 69/F             | SBO                         | No                                 |
| Li 1985       | China   | 1                  | 62/F             | SBO                         | Hysterectomy                       |
| Sugimoto 1985 | Japan   | 1                  | 38/M             | SBO                         | No                                 |
| Matsuda 1989  | Japan   | 1                  | 64/M             | SBO                         | No                                 |
| Mo 1991       | Korea   | 1                  | 59/M             | SBO                         | No                                 |
| Johnson 1992  | USA     | 1                  | 20/F<br>pregnant | SBO                         | No                                 |
| Tada 1994     | Japan   | 1                  | 83/M             | SBO                         | No                                 |
| Zhang 1995    | China   | 1                  | 51/M             | SBO                         | No                                 |
| Luo 1996      | China   | 1                  | 69/F             | SBO, appendicitis           | Hysterectomy                       |
| Murakami 1996 | Japan   | 1                  | 80 M             | SBO                         | No                                 |
| Perez 1997    | Spain   | 1                  | 54/M             | SBO                         | Cholecistectomy                    |
| Ido 1998      | Japan   | 1                  | 66/M             | SBO                         | No                                 |
| Igarashi 1998 | Japan   | 1                  | 60/M             | SBO                         | No                                 |
| Kaneko 1998   | Japan   | 1                  | 53/F             | SBO                         | No                                 |
| Teruya 1998   | Japan   | 1                  | 79/M             | SBO                         | No                                 |
| He 1999       | China   | 1                  | 55/M             | SBO                         | No                                 |

|                        |         |   |                  |            |                   |
|------------------------|---------|---|------------------|------------|-------------------|
| Shibahara<br>1999      | Japan   | 1 | 50/M             | SBO        | No                |
| Kobayashi<br>2000      | Japan   | 2 | 44/F<br>57/M     | SBO<br>SBO | No<br>No          |
| Endo 2001              | Japan   | 1 | 69/M             | SBO        | No                |
| Hokutani<br>2001       | Japan   | 1 | 80/M             | SBO        | No                |
| Sogo 2001              | Japan   | 1 | 65/M             | SBO        | No                |
| Takikawa<br>2001       | Japan   | 1 | 62/M             | SBO        | No                |
| Maruyama<br>2002       | Japan   | 2 | 71/M<br>78/M     | SBO<br>SBO | Gastrectomy<br>No |
| Sasaki 2002            | Japan   | 1 | 63/M             | SBO        | Appendicectomy    |
| Katayanagi<br>2003     | Japan   | 1 | 59/M             | SBO        | No                |
| Watanabe<br>2003       | Japan   | 1 | 68/M             | SBO        | No                |
| Akiyama<br>2004        | Japan   | 1 | 39/F             | SBO        | Caesarean section |
| Koinuma<br>2004        | Japan   | 1 | 40/F             | SBO        | No                |
| Motohiro<br>2004       | Japan   | 1 | 60/M             | SBO        | No                |
| Yu 2004                | China   | 1 | 81/F             | SBO        | No                |
| Maruyama<br>2005       | Japan   | 1 | 33/M             | SBO        | No                |
| Mitsui 2005            | Japan   | 1 | 33/F             | SBO        | No                |
| Nachi 2005             | Japan   | 1 | 62/M             | SBO        | No                |
| Ota 2005               | Japan   | 1 | 59/M             | SBO        | No                |
| Shinto 2005            | Japan   | 1 | 96/M             | SBO        | No                |
| Van der<br>Mieren 2005 | Belgium | 1 | F/<br>Postpartum | SBO        | No                |
| Waku 2005              | Japan   | 1 | 65/F             | SBO        | No                |

|                   |         |   |              |                          |                |
|-------------------|---------|---|--------------|--------------------------|----------------|
| Yang 2005         | Taiwan  | 1 | 66/M         | SBO                      | No             |
| Hoshikawa 2006    | Japan   | 1 | 61/M         | SBO                      | No             |
| Nitta 2006        | Japan   | 1 | 39/M         | SBO                      | No             |
| Isobe 2007        | Japan   | 1 | 54/M         | SBO                      | No             |
| Zhou 2007         | China   | 1 | 57/M         | SBO                      | No             |
| Collins 2008      | Ireland | 1 | 60/M         | SBO                      | No             |
| Hibino 2008       | Japan   | 1 | 64/F         | SBO                      | No             |
| Papanikolaou 2008 | Greece  | 1 | 3/F          | SBO                      | No             |
| Tsukahara 2008    | Japan   | 2 | 34/M<br>68/M | SBO<br>SBO               | No<br>No       |
| Bao SQ 2009       | China   | 1 | 62/F         | SBO                      | No             |
| Kan 2009          | Japan   | 1 | 46/M         | SBO                      | Appendicectomy |
| Murata 2009       | Japan   | 1 | 80/F         | SBO                      | No             |
| Moriyama 2010     | Japan   | 1 | 48/F         | SBO                      | No             |
| Nihon-yanagi 2010 | Japan   | 1 | 28/M         | SBO                      | No             |
| Okada 2010        | Japan   | 1 | 51/M         | SBO                      | No             |
| Oshima 2010       | Japan   | 1 | 30/F         | SBO                      | No             |
| Takayanagi 2010   | Japan   | 1 | 62/F         | SBO                      | No             |
| Takehita 2010     | Japan   | 1 | 56/F         | SBO                      | No             |
| Yang WL 2010      | China   | 2 | 62/M<br>48/M | SBO<br>SBO, appendicitis | No<br>No       |
| Agarwal 2011      | India   | 1 | 78/M         | SBO                      | No             |

|               |         |   |                      |                   |                                            |
|---------------|---------|---|----------------------|-------------------|--------------------------------------------|
| Guo 2011      | China   | 1 | 39/M                 | SBO               | No                                         |
| Harrison 2011 | England | 1 | 63/M                 | SBO               | No                                         |
| Jimmy 2011    | India   | 1 | 54/F                 | SBO               | No                                         |
| Kohga 2011    | Japan   | 1 | 39/M                 | SBO               | No                                         |
| Michiko 2011  | Japan   | 2 | 44/M<br>45/F         | SBO<br>SBO        | Appendicectomy<br>No                       |
| Satomura 2011 | Japan   | 2 | 79/M<br>80/M         | SBO<br>SBO        | No<br>No                                   |
| Yazawa 2011   | Japan   | 1 | 51/M                 | SBO               | Appendicectomy                             |
| Kim 2012      | Korea   | 1 | 44/F                 | SBO               | Tubal ligation                             |
| Koshino 2012  | Japan   | 1 | 81/M                 | SBO               | No                                         |
| Sawazaki 2012 | Japan   | 1 | 61/M                 | SBO               | No                                         |
| Shinoto 2012  | Japan   | 1 | 81/F                 | SBO               | No                                         |
| Yao 2012      | China   | 1 | 60/M                 | SBO               | No                                         |
| Miura 2013    | Japan   | 3 | 34/F<br>36/M<br>81/F | SBO<br>SBO<br>SBO | No<br>Laparoscopic surgery for<br>DP<br>No |
| Nishida 2013  | Japan   | 1 | 55/F                 | SBO               | No                                         |
| Saxena 2013   | India   | 1 | 63/M                 | SBO               | No                                         |
| Toyoda 2013   | Japan   | 2 | 35/F<br>37/M         | SBO<br>SBO        | No<br>No                                   |
| Bandawar 2014 | India   | 1 | 42/M                 | SBO               | No                                         |
| Li 2014       | China   | 1 | 59/M                 | SBO               | No                                         |
| Fukuzawa 2014 | Japan   | 1 | 39/M                 | SBO               | No                                         |
| Furukawa 2014 | Japan   | 1 | 42/M                 | SBO               | No                                         |



|                |           |   |                  |     |                                |
|----------------|-----------|---|------------------|-----|--------------------------------|
| Hori 2014      | Japan     | 1 | 46/M             | SBO | No                             |
| Mandava 2014   | India     | 1 | Elderly/F        | SBO | Hysterectomy                   |
| Siaperas 2014  | Greece    | 1 | 28/F             | SBO | Appendicectomy                 |
| Tanaka 2014    | Japan     | 1 | 49/F             | SBO | No                             |
| Watanabe 2014  | Japan     | 1 | 26/M             | SBO | No                             |
| Yang 2014      | Korea     | 1 | 49/F             | SBO | No                             |
| Campbell 2015  | England   | 1 | 56/F             | SBO | No                             |
| Farah 2015     | Morocco   | 1 | 44/M             | SBO | Segmental colectomy            |
| Hirata 2015    | Japan     | 1 | 35/F<br>pregnant | SBO | No                             |
| Horii 2015     | Japan     | 1 | 96/F             | SBO | No                             |
| Ishita 2015    | Japan     | 1 | 35/F<br>pregnant | SBO | No                             |
| Kuroda 2015    | Japan     | 1 | 64/F             | SBO | No                             |
| Reddy 2015     | India     | 1 | 50/M             | SBO | No                             |
| Shukla 2015    | India     | 1 | 62/M             | SBO | No                             |
| Watanabe 2015  | Japan     | 1 | 56/M             | SBO | No                             |
| Benyamini 2016 | Hawaii    | 1 | 40/F             | SBO | Pancreatectomy,<br>Splenectomy |
| Hattori 2016   | Japan     | 1 | 53/M             | SBO | No                             |
| Iwasaki 2016   | Japan     | 1 | 50/M             | SBO | No                             |
| Kheok 2016     | Singapore | 1 | 75/M             | SBO | No                             |
| Kojima 2016    | Japan     | 1 | 43/F             | SBO | No                             |
| Kumagai 2016   | Japan     | 1 | 82/M             | SBO | No                             |
| Matsui 2016    | Japan     | 1 | 51/M             | SBO | No                             |
| Agatsuma 2017  | Japan     | 1 | 17/F             | SBO | No                             |

|                |       |   |              |            |                                  |
|----------------|-------|---|--------------|------------|----------------------------------|
| Ahmad 2017     | USA   | 1 | 55/M         | SBO        | No                               |
| Chou 2017      | China | 1 | 55/M         | SBO        | Partial descending colectomy     |
| Hayama 2017    | Japan | 1 | 80/M         | SBO        | No                               |
| Hirashima 2017 | Japan | 1 | 60/M         | SBO        | No                               |
| Kayano 2017    | Japan | 2 | 42/F<br>53/M | SBO<br>SBO | No<br>No                         |
| Kishi 2017     | Japan | 1 | 56/M         | SBO        | No                               |
| Sasaki 2017    | Japan | 1 | 70/F         | SBO        | Appendicectomy,<br>Ovarian tumor |
| Shibuya 2017   | Japan | 1 | 45/F         | SBO        | No                               |
| Nagano 2018    | Japan | 1 | 52/M         | SBO        | Appendicectomy                   |
| Taniguchi 2018 | Japan | 1 | 72/F         | SBO        | Sigmoidectomy                    |

SDC 5. Type of surgical treatment

| References   | Time from onset to operation         | Surgical procedure                               | Adhesion | Bowel resection | Method of repair of the hernial orifice | Postoperative course          |
|--------------|--------------------------------------|--------------------------------------------------|----------|-----------------|-----------------------------------------|-------------------------------|
| Benson 1964  | 7 days                               | Explorative laparotomy                           | NR       | No              | Interrupted sutures                     | Uneventful                    |
| Steele 1973  | NR                                   | Explorative laparotomy                           | NR       | No              | Interrupted sutures                     | Uneventful                    |
| Fujioka 1976 | Day of admission<br>Day of admission | Open laparotomy<br>Open laparotomy               | NR<br>NR | No<br>No        | Closure the sac<br>Closure the sac      | Uneventful<br>Uneventful      |
| Bircher 1981 | 5 days<br>7days                      | Explorative laparotomy<br>Explorative laparotomy | NR<br>NR | Yes<br>No       | NR<br>NR                                | Wound infection<br>Uneventful |

|               |                  |                        |    |             |                      |            |
|---------------|------------------|------------------------|----|-------------|----------------------|------------|
| Li 1982       | 6h               | Explorative laparotomy | NR | Yes, 30 cm  | NR                   | Uneventful |
| Li 1985       | 4 days           | Explorative laparotomy | NR | Yes, 30 cm  | NR                   | Uneventful |
| Sugimoto 1985 | Day of admission | Open laparotomy        | NR | No          | NR                   | Uneventful |
| Matsuda 1989  | Day of admission | Open laparotomy        | NR | No          | Interrupted slitches | Uneventful |
| Mo 1991       | 10 days          | Explorative laparotomy | NR | Yes, 40 cm  | NR                   | Uneventful |
| Johnson 1992  | 7 days           | Explorative laparotomy | NR | Yes, 160 cm | NR                   | Uneventful |
| Tada 1994     | 8 days           | Open laparotomy        | NR | No          | Sutures              | Uneventful |
| Zhang 1995    | 37 h             | Explorative laparotomy | NR | Yes, 40 cm  | NR                   | Uneventful |
| Luo 1996      | 24 h             | Explorative laparotomy | NR | Yes, 40 cm  | NR                   | Uneventful |
| Murakami 1996 | 10 days          | Open laparotomy        | NR | No          | Sutures              | Uneventful |
| Perez 1997    | NR               | Explorative laparotomy | NR | Yes         | Sutures              | Uneventful |
| Ido 1998      | 3 days           | Open laparotomy        | NR | No          | Sutures              | Uneventful |
| Igarashi 1998 | 11 days          | Open laparotomy        | NR | No          | Interrupted sutures  | Uneventful |
| Kaneko 1998   | Day of admission | Emergency laparotomy   | NR | Yes         | NR                   | Uneventful |
| Teruya 1998   | 7 days           | Open laparotomy        | NR | No          | Interrupted sutures  | Uneventful |
| He 1999       | 72 h             | Explorative laparotomy | NR | Yes, 100 cm | Interrupted sutures  | Uneventful |

|                 |               |                                                  |           |            |                                            |                          |
|-----------------|---------------|--------------------------------------------------|-----------|------------|--------------------------------------------|--------------------------|
| Shibahara 1999  | 7 days        | Open laparotomy                                  | NR        | No         | Sutures                                    | Uneventful               |
| Kobayashi 2000  | NR<br>21 days | Open laparotomy<br>Open laparotomy               | Yes<br>NR | Yes<br>No  | Sutures<br>Sutures                         | Uneventful<br>Uneventful |
| Endo 2001       | NR            | Open laparotomy                                  | NR        | No         | NR                                         | Uneventful               |
| Okutani 2001    | 4 days        | Open laparotomy                                  | NR        | Yes        | NR                                         | Uneventful               |
| Sogo 2001       | 11 days       | Open laparotomy                                  | NR        | No         | Sutures                                    | Uneventful               |
| Takikawa 2001   | 9 days        | Open laparotomy                                  | NR        | Yes, 7 cm  | Sutures                                    | Uneventful               |
| Maruyama 2002   | 8h<br>22 days | Explorative laparotomy<br>Explorative laparotomy | NR<br>NR  | No<br>No   | Interrupted sutures<br>Interrupted sutures | Uneventful<br>Uneventful |
| Sasaki 2002     | NR            | Emergency laparoscopy and then open laparotomy   | NR        | Yes, 30 cm | NR                                         | Uneventful               |
| Katayanagi 2003 | 34 days       | Open laparotomy                                  | NR        | No         | Sutures                                    | Uneventful               |
| Watanabe 2003   | 15 days       | Full laparoscopic                                | NR        | No         | NR                                         | Uneventful               |
| Akiyama 2004    | 14 days       | Open laparotomy                                  | NR        | No         | Sutures                                    | Uneventful               |
| Koinuma 2004    | NR            | Full laparoscopic                                | NR        | No         | Hernia stapler                             | Uneventful               |
| Motohiro 2004   | NR            | Open laparotomy                                  | NR        | No         | NR                                         | Uneventful               |
| Yu 2004         | 12 h          | Explorative laparotomy                           | NR        | Yes, 5 cm  | NR                                         | Uneventful               |

|                     |                  |                        |    |            |                     |            |
|---------------------|------------------|------------------------|----|------------|---------------------|------------|
| Maruyama 2005       | 16 days          | Full laparoscopic      | NR | No         | NR                  | Uneventful |
| Mitsui 2005         | 10 days          | Full laparoscopic      | NR | No         | Sutures             | Uneventful |
| Nachi 2005          | 26 days          | Open laparotomy        | NR | No         | Sutures             | Uneventful |
| Ota 2005            | 16 days          | Open laparotomy        | NR | No         | Sutures             | Uneventful |
| Shinto 2005         | 15 days          | Open laparotomy        | NR | No         | Sutures             | Uneventful |
| Van der Mieren 2005 | Day of admission | Full laparoscopic      | NR | No         | Sutures             | Uneventful |
| Waku 2005           | 6 days           | Open laparotomy        | NR | No         | Sutures             | Uneventful |
| Yang 2005           | 48 h             | Emergency laparotomy   | NR | No         | Sutures             | Uneventful |
| Hoshikawa 2006      | 13 days          | Open laparotomy        | NR | No         | Sutures             | Uneventful |
| Nitta 2006          | 16 days          | Full laparoscopic      | NR | No         | Sutures             | Uneventful |
| Isobe 2007          | 6 days           | Full laparoscopic      | NR | No         | Sutures             | Uneventful |
| Zhou 2007           | 48 h             | Explorative laparotomy | NR | Yes, 20 cm | Sutures             | Uneventful |
| Collins 2008        | 48 h             | Explorative laparotomy | NR | No         | Interrupted sutures | Uneventful |
| Hibino 2008         | NR               | Open laparotomy        | NR | Yes, 60 cm | Sutures             | Uneventful |
| Papanikolaou 2008   | 12 h             | Explorative laparotomy | NR | Yes, 60 cm | NR                  | Uneventful |

|                          |                     |                                                        |          |                                |                                                  |                                  |
|--------------------------|---------------------|--------------------------------------------------------|----------|--------------------------------|--------------------------------------------------|----------------------------------|
| Tsukahara<br>2008        | NR<br>NR            | Open laparotomy<br>Open laparotomy                     | NR<br>NR | Yes<br>No                      | Interrupted<br>sutures<br>Interrupted<br>sutures | Uneventf<br>ul<br>Uneventf<br>ul |
| Bao SQ<br>2009           | 37 h                | Explorative<br>laparotomy                              | NR       | Yes, 12<br>cm                  | NR                                               | Uneventf<br>ul                   |
| Kan 2009                 | 18 days             | Explorative<br>laparotomy                              | NR       | Yes                            | NR                                               | Uneventf<br>ul                   |
| Murata<br>2009           | 13 days             | Open laparotomy                                        | NR       | No                             | Interrupted<br>sutures                           | Uneventf<br>ul                   |
| Moriyama<br>2010         | 15 h                | Open laparotomy                                        | NR       | No                             | Sutures                                          | Uneventf<br>ul                   |
| Nihon-<br>Yanagi<br>2010 | NR                  | Explorative<br>laparotomy                              | Yes      | No                             | Running<br>sutures                               | Uneventf<br>ul                   |
| Okada 2010               | 7 days              | Explorative<br>laparotomy                              | NR       | Yes                            | Sutures                                          | Uneventf<br>ul                   |
| Oshima<br>2010           | NR                  | Open laparotomy                                        | NR       | No                             | Sutures                                          | Uneventf<br>ul                   |
| Takayanagi<br>2010       | 15 days             | Open laparotomy                                        | NR       | NR                             | Sutures                                          | Uneventf<br>ul                   |
| Takehita<br>2010         | 7 days              | Explorative<br>laparotomy                              | NR       | No                             | NR                                               | Uneventf<br>ul                   |
| Yang WL<br>2010          | 9h<br>24 h          | Explorative<br>laparotomy<br>Explorative<br>laparotomy | NR<br>NR | Yes, 20<br>cm<br>Yes, 30<br>cm | NR<br>NR                                         | Uneventf<br>ul<br>Uneventf<br>ul |
| Agarwal<br>2011          | Day of<br>admission | Explorative<br>laparotomy                              | NR       | No                             | Interrupted<br>sutures                           | Uneventf<br>ul                   |
| Guo 2011                 | 9 h                 | Explorative<br>laparotomy                              | NR       | Yes, 65<br>cm                  | NR                                               | Uneventf<br>ul                   |
| Harrison<br>2011         | NR                  | Explorative<br>laparotomy                              | NR       | Yes                            | NR                                               | Uneventf<br>ul                   |

|               |                             |                                                             |                |                |                               |                                        |
|---------------|-----------------------------|-------------------------------------------------------------|----------------|----------------|-------------------------------|----------------------------------------|
| Jimmy 2011    | NR                          | Full laparoscopic                                           | NR             | No             | Intra-corporeal sutures       | Uneventful                             |
| Kohga 2011    | NR                          | Full laparoscopic                                           | NR             | No             | Sutures                       | Uneventful                             |
| Michiko 2011  | 13 days<br>Day of admission | Explorative laparotomy<br>Emergency laparotomy              | NR<br>NR       | No<br>No       | Sutures<br>Sutures            | Uneventful<br>Uneventful               |
| Satomura 2011 | 3 days<br>9 days            | Full laparoscopic<br>Full laparoscopic                      | NR<br>NR       | No<br>No       | Sutures<br>Sutures            | Uneventful<br>Uneventful               |
| Yazawa 2011   | NR                          | Full laparoscopic                                           | No             | No             | Sutures                       | Uneventful                             |
| Kim 2012      | NR                          | Explorative laparoscopy and the an open laparotomy          | Yes            | Yes            | Non-absorbable sutures        | Uneventful                             |
| Koshino 2012  | 14 days                     | Open laparotomy                                             | NR             | No             | Sutures                       | Uneventful                             |
| Sawazaki 2012 | 18 days                     | First an explorative laparoscopy and the an open laparotomy | Yes            | No             | Sutures                       | Uneventful                             |
| Shinoto 2012  | NR                          | Open laparotomy                                             | NR             | NR             | NR                            | Uneventful                             |
| Yao 2012      | 7 h                         | Explorative laparotomy                                      | NR             | Yes, 30 cm     | NR                            | Uneventful                             |
| Miura 2013    | 3 days<br>1 day<br>3 days   | Open laparotomy<br>Open laparotomy<br>Open laparotomy       | NR<br>NR<br>NR | No<br>No<br>No | Sutures<br>Sutures<br>Sutures | Uneventful<br>Uneventful<br>Uneventful |

|               |                  |                                                   |          |          |                         |                          |
|---------------|------------------|---------------------------------------------------|----------|----------|-------------------------|--------------------------|
| Nishida 2013  | NR               | Full laparoscopic                                 | NR       | No       | Sutures                 | Uneventful               |
| Saxena 2013   | NR               | Emergency laparotomy                              | NR       | Yes      | NR                      | Uneventful               |
| Toyoda 2014   | 14 h<br>10 h     | Full laparoscopic<br>Full laparoscopic            | NR<br>NR | No<br>No | Sutures<br>Sutures      | Uneventful<br>Uneventful |
| Bandawar 2014 | NR               | Explorative laparotomy                            | NR       | Yes      | NR                      | Uneventful               |
| Fukuzawa 2014 | 10 days          | Full laparoscopic                                 | NR       | No       | NR                      | Uneventful               |
| Furukawa 2014 | 13 days          | Emergency laparoscopy                             | NR       | No       | Sutures                 | Uneventful               |
| Hori 2014     | 24 h             | Full laparoscopic                                 | NR       | Yes      | Sutures                 | Uneventful               |
| Li 2014       | 5 days           | Emergency laparotomy                              | NR       | No       | NR                      | Uneventful               |
| Mandava 2014  | Day of admission | Emergency laparotomy                              | NR       | Yes      | NR                      | Uneventful               |
| Siaperas 2014 | NR               | Diagnostic laparoscopy and then a mini-laparotomy | NR       | Yes      | Interrupted sutures     | Uneventful               |
| Tanaka 2014   | Day of admission | Emergency laparotomy                              | Yes      | No       | NR                      | Uneventful               |
| Watanabe 2014 | 6 days           | Full laparoscopic                                 | Yes      | No       | Interrupted sutures     | Uneventful               |
| Yang 2014     | 2 days           | Full laparoscopic                                 | NR       | No       | NR                      | Uneventful               |
| Campbel 2015  | Day of admission | Full laparoscopic                                 | NR       | No       | Intra-corporeal sutures | Uneventful               |
| Farah 2015    | NR               | Explorative laparotomy                            | NR       | No       | Interrupted sutures     | Uneventful               |



|                |                  |                               |    |           |                         |                                    |
|----------------|------------------|-------------------------------|----|-----------|-------------------------|------------------------------------|
| Hirata 2015    | 3 days           | Caesarian section, laparotomy | NR | No        | NR                      | Uneventful                         |
| Horii 2015     | Day of admission | Emergency laparotomy          | NR | Yes       | NR                      | Death for AP 46 days after surgery |
| Ishita 2015    | 3 days           | Caesarian section, laparotomy | NR | NR        | Sutures                 | Uneventful                         |
| Kuroda 2015    | 9 days           | Full laparoscopic             | NR | Yes, 5 cm | Intra-corporeal sutures | Uneventful                         |
| Reddy 2015     | 5 days           | Explorative laparotomy        | NR | No        | NR                      | Uneventful                         |
| Shukla 2015    | NR               | Explorative laparotomy        | NR | Yes       | NR                      | Death for RD 2 months later        |
| Watanabe 2015  | 3 days           | Full laparoscopic             | NR | No        | Sutures                 | Uneventful                         |
| Benyamini 2016 | 48 h             | Full laparoscopic             | NR | No        | NR                      | Uneventful                         |
| Hattori 2016   | 48 h             | Full laparoscopic             | NR | No        | Non-absorbable sutures  | Uneventful                         |
| Iwasaki 2016   | 7 days           | Open laparotomy               | NR | No        | Sutures                 | Uneventful                         |
| Kheok 2016     | NR               | Explorative laparotomy        | NR | Yes       | NR                      | Uneventful                         |
| Kojima 2016    | NR               | Full Laparoscopic             | NR | No        | NR                      | Uneventful                         |
| Kumagai 2016   | 14 days          | Full laparoscopic             | NR | No        | NR                      | Uneventful                         |
| Matsui 2016    | 4 days           | Full laparoscopic             | NR | No        | Interrupted sutures     | Uneventful                         |

|                 |                 |                                        |           |           |                                                  |                          |
|-----------------|-----------------|----------------------------------------|-----------|-----------|--------------------------------------------------|--------------------------|
| Agatsuma 2017   | NR              | Open laparotomy                        | NR        | No        | Running sutures                                  | Uneventful               |
| Ahmad 2017      | 24 h            | Explorative laparotomy                 | NR        | No        | Absorbable sutures                               | Uneventful               |
| Chou 2017       | 5 days          | Full Laparoscopic                      | NR        | No        | NR                                               | Uneventful               |
| Hayama 2017     | 9 days          | Full laparoscopic                      | NR        | No        | Opening hernia orifice                           | Uneventful               |
| Hirashima 2017  | NR              | Explorative laparotomy                 | NR        | No        | NR                                               | Uneventful               |
| Kayano 2017     | 7 days<br>7days | Full laparoscopic<br>Full laparoscopic | Yes<br>NR | Yes<br>No | Intracorporeal sutures<br>Intracorporeal sutures | Uneventful<br>Uneventful |
| Kishi 2017      | NR              | Full laparoscopic                      | NR        | No        | NR                                               | Uneventful               |
| Sasaki 2017     | NR              | Full laparoscopic                      | NR        | No        | Sutures                                          | Uneventful               |
| Shibuya 2017    | 14 days         | Full aparoscopic                       | Yes       | No        | NR                                               | Uneventful               |
| Nagano 2018     | 9 days          | Open laparotomy                        | NR        | No        | Absorbable sutures                               | Uneventful               |
| Tanighuchi 2018 | NR              | First SPS and then laparotomy          | Yes       | No        | NR                                               | Uneventful               |

SDC 6: Characteristics of the defect and incarcerated small bowel

| References   | Diameter of defect (cm) | Length of incarcerated small bowel (cm) |
|--------------|-------------------------|-----------------------------------------|
| Benson 1964  | 2                       | 15                                      |
| Steele 1973  | 2                       | NR                                      |
| Fujioka 1976 | 2,5<br>1,5              | 3<br>5                                  |

|                 |          |          |
|-----------------|----------|----------|
| Bircher 1981    | NR<br>NR | NR<br>NR |
| Li 1982         | 4        | NR       |
| Li 1985         | 2        | NR       |
| Sugimoto 1985   | 3        | 15       |
| Matsuda 1989    | 3        | 10       |
| Mo 1991         | 3        | NR       |
| Johnson 1992    | 5        | NR       |
| Tada 1994       | 2        | 10       |
| Zhang 1995      | 3        | NR       |
| Luo 1996        | 3        | NR       |
| Murakami 1996   | 1,5      | 5        |
| Perez 1997      | NR       | NR       |
| Ido 1998        | 1        | NR       |
| Igarashi 1998   | 2,1      | 7,5      |
| Kaneko 1998     | 2,5      | 150      |
| Teruya 1998     | 1,5      | 10       |
| He 1999         | 3        | NR       |
| Shibahara 1999  | 1,5      | NR       |
| Kobayashi 2000  | 2<br>2   | 20<br>10 |
| Endo 2001       | 2        | 130      |
| Okutani 2001    | 10       | 70       |
| Sogo 2001       | 3        | NR       |
| Takikawa 2001   | 2        | 70       |
| Maruyama 2002   | 3<br>2,5 | 5<br>5   |
| Sasaki 2002     | 3,5      | 30       |
| Katayanagi 2003 | 3        | 15       |
| Watanabe 2003   | NR       | 10       |
| Akiyama 2004    | 2        | 4        |
| Koinuma 2004    | 2        | NR       |

|                     |        |          |
|---------------------|--------|----------|
| Motohiro 2004       | 5      | 50       |
| Yu 2004             | 5      | NR       |
| Maruyama 2005       | 2,5    | NR       |
| Mitsui 2005         | 3      | 15       |
| Nachi 2005          | 2,5    | 10       |
| Ota 2005            | 3      | NR       |
| Shinto 2005         | 2      | NR       |
| Van der Mieren 2005 | NR     | NR       |
| Waku 2005           | 2,5    | NR       |
| Yang 2005           | NR     | 20       |
| Hoshikawa 2006      | 2      | NR       |
| Nitta 2006          | 2,5    | NR       |
| Isobe 2007          | 3      | 4        |
| Zhou 2007           | 3      | NR       |
| Collins 2008        | 4      | NR       |
| Hibino 2008         | 3      | 40       |
| Papanikolaou 2008   | 5      | NR       |
| Tsukahara 2008      | 3<br>2 | 10<br>20 |
| Bao SQ 2009         | 3      | NR       |
| Kan 2009            | 4      | NR       |
| Murata 2009         | 2      | 4        |
| Moriyama 2010       | 2      | 15       |
| Nihon-Yanagi 2010   | 3      | NR       |
| Okada 2010          | 1,5    | 10       |
| Oshima 2010         | 1      | 10       |
| Takayanagi 2010     | 2      | NR       |
| Takeshita 2010      | 2,5    | 20       |
| Yang WL 2010        | 5<br>4 | NR<br>NR |

|               |               |                |
|---------------|---------------|----------------|
| Agarwal 2011  | 1,8           | 15             |
| Guo 2011      | 4             | NR             |
| Harrison 2011 | NR            | NR             |
| Jimmy 2011    | 2             | NR             |
| Kohga 2011    | 3             | NR             |
| Michiko 2011  | 1,5<br>2      | 7<br>NR        |
| Satomura 2011 | 4<br>3        | 8<br>10        |
| Yazawa 2011   | 1,5           | 10             |
| Kim 2012      | 3             | 150            |
| Koshino 2012  | 2             | 10             |
| Sawazaki 2012 | 2             | 10             |
| Shinoto 2012  | 2             | 150            |
| Yao 2012      | 4             | NR             |
| Miura 2013    | 2<br>3<br>1,5 | NR<br>NR<br>15 |
| Nishida 2013  | 2             | 10             |
| Saxena 2013   | 4             | 50             |
| Toyoda 2013   | 2<br>1        | 20<br>75       |
| Bandawar 2014 | 2             | 25             |
| Fukuzawa 2014 | NR            | NR             |
| Furukawa 2014 | 2             | 10             |
| Hori 2014     | 3             | NR             |
| Li 2014       | 2,5           | 15             |
| Mandava 2014  | NR            | NR             |
| Siaperas 2014 | 3             | NR             |
| Tanaka 2014   | 2             | 5              |
| Watanabe 2014 | 3             | 10             |
| Yang 2014     | 2             | 15             |

|                |                |     |
|----------------|----------------|-----|
| Campbel 2015   | 3              | 6   |
| Farah 2015     | 4,5            | NR  |
| Hirata 2015    | 2              | NR  |
| Horii 2015     | 2              | 30  |
| Ishita 2015    | 2              | NR  |
| Kuroda 2015    | 3              | 10  |
| Reddy 2015     | NR             | NR  |
| Shukla 2015    | 2              | NR  |
| Watanabe 2015  | 3              | 15  |
| Benyamini 2016 | 2              | NR  |
| Hattori 2016   | 2              | 5   |
| Iwasaki 2016   | 2              | 10  |
| Kheok 2016     | 3              | 10  |
| Kojima 2016    | NR             | 15  |
| Kumagai 2016   | NR             | NR  |
| Matsui 2016    | 2              | 5   |
| Agatsuma 2017  | “small defect” | 30  |
| Ahmad 2017     | 2,5            | 8   |
| Chou 2017      | NR             | 10  |
| Hayama 2017    | 2,5            | 10  |
| Hirashima 2017 | NR             | 100 |
| Kayano 2017    | NR             | NR  |
| Kayano 2017    | NR             | NR  |
| Kishi 2017     | NR             | 50  |
| Sasaki 2017    | 1,5            | NR  |
| Shibuya 2017   | NR             | NR  |
| Nagano 2018    | 2              | 6   |
| Taniguchi 2018 | NR             | NR  |
